# Supplementary material
Source: Research Square preprint supplement (doi:10.21203/rs.3.rs-9542409/v1)
Supplement: Supplementary file 1 [file 3f9de117066d250e2a4f4575.docx]

**Additional file 1: EMS-SHIELD session ground rules**

These ground rules are adapted from the current Clinical Supervision policy guidelines provided by the participating ambulance Trust. As per this policy, the guidelines can be added to and agreed upon between participant and facilitator at the beginning of an EMS-SHIELD session to adapt to individual needs and circumstances.

- Confidentiality/safety: Participants and facilitators agree to not discuss any details of an EMS-SHIELD session. The only exception is when risk of harm is identified, such as suicidal ideation. In this incidence the facilitator will work with the participant to take appropriate action in line with safeguarding policy and procedure [61].
- Session goals: Sessions will be SMART (Specific, Measurable, Achievable, Relevant, and Time-based) in nature. The session will be 1-hour in length in line with current clinical supervision practice. All participants are expected to arrive punctually.
- Time Out: Sessions will not be interrupted by persons outside of the session once the session has started, as this interrupts the flow of discussion. However, participants are free to leave the session at any time if a ‘time out’ is required. They are free to return to the session anytime during the allotted session time.
- The only exceptions to sessions being interrupted by external factors occur when participants are the nearest available resource to a subset of time-critical, high-risk emergencies, such as cardiac arrest, myocardial infarction, stroke, or a major incident occurs.
- The session will always start with a ‘check-in’ question - ‘To start with, a lot of people find it hard to balance work and self-care. How has it been for you? You can share as much or as little as you like - this is your space.’
- The session will always close with an open & honest review, to include what worked well and what needs improvement.
- Participants will agree on any further ground rules with their facilitator, such as whether mobile phones and emergency radios should be silenced or left on.
