# Supplementary material
Source: Research Square preprint supplement (doi:10.21203/rs.3.rs-9542409/v1)
Supplement: Supplementary file 2 [file d9ce796d88b41215f263d871.docx]

**Additional file 2: EMS-SHIELD Fidelity Checklist**

**Facilitator ID:** ___________  **Participant ID:** ___________  **Cluster ID:** ___________
**Date:** ____ / ____ / ______  **Start Time:** ______  **End Time:** ______

**Session content fidelity**

Please tick the relevant box

1. **Ground rules and session framework**

Yes ☐ No ☐ - Introduction and purpose of the EMS-SHIELD session explained
Yes ☐ No ☐ - Confidentiality/safety boundaries agreed (incl. safeguarding exceptions)
Yes ☐ No ☐ - Time‑keeping and time-out agreed (incl. mobile/radio interruption parameters)
Yes ☐ No ☐ - Check-in ‘How have you been getting on?’ completed

Yes ☐ No ☐ - Participant shared and reflected on work-related experience/s and their emotional impact. Did they focus on mainly (tick which option applies):

☐ positive experiences

☐ negative experiences?

If not, please specify any deviations:

**2. Safeguarding**
Yes ☐ No ☐

- No safeguarding issues identified
- Yes - safeguarding issue identified – summary of issue & mitigating action/s taken:

**Adherence to EMS-SHIELD protocol**

**3. Available employee mental health support update**
Yes ☐ No ☐ - Information about Employee Assistance Programme (EAP) support options provided
Yes ☐ No ☐ - Participant signposted to relevant support services if indicated

– please list services signposted to:

**4. Wellness Action Plan**
☐ Wellness Action Plan completed during session
☐ Wellness Action Plan already in place (reviewed/updated)
☐ Not completed – reason: __________________________________

**5. Session interruptions**
☐ No interruptions
☐ 999 emergency – within agreed interruption parameters

Emergency category: ___________________
☐ 999 emergency – outside agreed interruption parameters

Emergency category: ___________________
☐ Other interruption – please specify: ___________________________________________

**6. Session content**

Yes ☐ No ☐ - Session lasted full 60 minutes (±5 min)
Yes ☐ No ☐ - Content aligned with the agreed protocol
Yes ☐ No ☐ - Participant actively engaged throughout
Yes ☐ No ☐ - Reflection and review conducted at close

If not, please specify deviations:

**Facilitator Signature: _____________________  Date: ____ / ____ / ______**

**Facilitator Reflection**
